# Supplementary material for: Nuclear DNA content in Miscanthus sp. and the geographical variation pattern in Miscanthus lutarioriparius
Source: PubMed Central journal article supplement (PMC5048105; doi:10.1038/srep34342), 2016-10-04
Supplement: srep34342-s1.pdf [file srep34342-s1.pdf]

## Supplementary Information

### **Nuclear DNA content in *Miscanthus* sp. and the geographical variation pattern in *Miscanthus lutarioriparius***

Jiajing Sheng<sup>1</sup> Xiaohu Hu<sup>1</sup> Xiaofei Zeng<sup>1</sup> Ye LI<sup>1</sup> Fasong Zhou<sup>1</sup> Zhongli Hu<sup>1</sup> Surong Jin<sup>2\*</sup> Ying Diao<sup>1\*</sup>

1 State Key Laboratory of Hybrid Rice, College of Life Science, Wuhan University, Wuhan 430072, China;

2 School of Chemistry, Chemical Engineering and Life Sciences, Wuhan University of Technology, Wuhan 430070, China

**Correspondence:** Ying Diao. Fax: +86-27-68753606, E-mail: [ydiao@whu.edu.cn](mailto:ydiao@whu.edu.cn)  
Surong Jin. Fax: +86-27-68753611, E-mail: [jinsr@163.com](mailto:jinsr@163.com)

Supplementary Table S1 2C DNA content, 1C mean genome size and geographic origin of 79 *M. lutarioriparius* accessions

| Accession | 2C DNA content | 2C/2n | Mean genome size | Latitude   | Longitude   |
|-----------|----------------|-------|------------------|------------|-------------|
| name      | Mean ±SE       |       | (Mbp/1C)         | (N)        | (E)         |
| A-03-5    | 4.23           | 2.115 | 2068.47          | 29°59.359' | 113°56.022' |
| A-02-5    | 4.22           | 2.11  | 2063.58          | 30°07.784' | 114°06.835' |
| A-05-5    | 4.28           | 2.14  | 2092.92          | 29°32.007' | 114°05.832' |
| A-01-5    | 4.11           | 2.055 | 2009.79          | 30°07.784' | 114°06.835' |
| A-15-1    | 4.19           | 2.095 | 2048.91          | 29°37.695' | 116°14.253' |
| A-16-5    | 4.19           | 2.095 | 2048.91          | 29°43.506' | 116°13.797' |
| B-02-5    | 4.35           | 2.175 | 2127.15          | 29°44.247' | 116°15.285' |
| B-03-5    | 4.36           | 2.18  | 2132.04          | 29°46.057' | 116°18.558' |
| B-05-5    | 4.27           | 2.135 | 2088.03          | 30°01.215' | 116°42.225' |
| B-06-5    | 4.05           | 2.025 | 1980.45          | 30°01.215' | 116°42.225' |
| B-07-1    | 4.17           | 2.085 | 2039.13          | 30°08.091' | 117°00.814' |
| B-12-1    | 4.35           | 2.175 | 2127.15          | 30°30.287' | 117°01.599' |
| B-13-5    | 4.14           | 2.07  | 2024.46          | 30°28.089' | 117°08.870' |
| B-04-5    | 4.15           | 2.075 | 2029.35          | 29°46.057' | 116°18.558' |
| B-15-1    | 4.2            | 2.1   | 2053.8           | 30°28.538' | 117°13.170' |
| B-08-5    | 4.19           | 2.095 | 2048.91          | 30°03.318' | 116°45.704' |
| C-01-5    | 4.21           | 2.105 | 2058.69          | 30°45.507' | 117°36.995' |
| C-02-5    | 4.57           | 2.285 | 2234.73          | 30°45.507' | 117°36.995' |
| C-04-1    | 4.37           | 2.183 | 2134.49          | 30°54.775' | 117°48.169' |
| C-04-5    | 4.79           | 2.395 | 2342.31          | 30°46.167' | 117°39.501' |

|        |      |       |         |             |              |
|--------|------|-------|---------|-------------|--------------|
| C-10-5 | 4.46 | 2.23  | 2180.94 | 31 °14.938' | 118 °18.002' |
| C-12-1 | 4.29 | 2.145 | 2097.81 | 31 °33.909' | 118 °28.541' |
| C-12-5 | 4.39 | 2.195 | 2146.71 | 31 °15.863' | 118 °40.692' |
| C-13-5 | 4.42 | 2.21  | 2161.38 | 31 °49.285' | 118 °34.692' |
| C-15-1 | 8.12 | 4.06  | 3970.68 | 32 °08.758' | 119 °00.916' |
| C-16-5 | 4.12 | 2.06  | 2014.68 | 31 °50.370' | 118 °35.668' |
| C-08-5 | 4.49 | 2.245 | 2195.61 | 31 °00.756' | 118 °03.757' |
| D-02-5 | 8.07 | 4.035 | 3946.23 | 32 °10.799' | 119 °13.314' |
| D-04-5 | 7.76 | 3.88  | 3794.64 | 32 °10.766' | 119 °19.409' |
| D-10-1 | 4.45 | 2.225 | 2176.05 | 31 °37.676' | 120 °04.645' |
| D-15-1 | 8.24 | 4.12  | 3980.46 | 31 °04.350' | 120 °55.664' |
| D-16-5 | 8.48 | 4.24  | 4146.72 | 31 °13.121' | 120 °28.516' |
| D-06-5 | 8.55 | 4.275 | 4180.95 | 31 °57.571' | 119 °49.167' |
| E-03-5 | 8.61 | 4.305 | 4210.29 | 32 °20.249' | 119 °46.889' |
| E-04-1 | 7.71 | 3.855 | 3770.19 | 32 °17.623' | 119 °31.015' |
| E-07-1 | 8.43 | 4.215 | 4122.27 | 33 °05.709' | 118 °34.159' |
| E-09-5 | 9.5  | 4.75  | 4645.5  | 33 °04.482' | 118 °34.797' |
| E-01-1 | 7.45 | 3.725 | 3643.05 | 31 °29.629' | 121 °16.407' |
| E-12-5 | 8.73 | 4.365 | 4268.97 | 33 °02.535' | 118 °37.124' |
| E-13-1 | 8.17 | 4.085 | 3995.13 | 33 °02.486' | 118 °43.526' |
| E-13-5 | 7.81 | 3.905 | 3819.09 | 33 °16.708' | 118 °49.765' |
| E-16-5 | 8.39 | 4.195 | 4102.71 | 33 °17.212' | 118 °54.632' |
| F-01-5 | 8.43 | 4.215 | 4122.27 | 33 °06.866' | 119 °02.924' |
| F-04-5 | 8.42 | 4.21  | 4117.38 | 33 °05.938' | 119 °02.476' |
| F-06-5 | 8.29 | 4.145 | 4053.81 | 33 °00.922' | 118 °58.444' |
| F-07-5 | 7.82 | 3.91  | 3823.98 | 33 °00.761' | 119 °03.614' |
| F-14-1 | 8.01 | 4.005 | 3916.89 | 33 °03.452' | 119 °24.163' |
| F-16-1 | 4.34 | 2.17  | 2122.26 | 30 °23.522' | 114 °07.791' |
| F-08-1 | 8.81 | 4.405 | 4308.09 | 33 °04.274' | 119 °07.675' |
| G-01-5 | 4.41 | 2.205 | 2156.49 | 30 °12.885' | 113 °50.326' |
| G-04-5 | 4.46 | 2.23  | 2180.94 | 30 °10.505' | 113 °51.052' |
| G-10-5 | 4.39 | 2.195 | 2146.71 | 29 °37.733' | 113 °07.456' |
| G-11-1 | 4.51 | 2.255 | 2205.39 | 29 °52.127' | 112 °50.242' |
| G-12-5 | 4.39 | 2.195 | 2146.71 | 29 °40.649' | 113 °06.758' |
| G-13-5 | 3.97 | 1.985 | 1941.33 | 30 °04.368' | 112 °24.636' |
| G-02-1 | 4.47 | 2.175 | 2127.15 | 30 °20.838' | 114 °03.446' |
| G-05-5 | 4.74 | 2.37  | 2317.86 | 29 °46.540' | 113 °24.441' |
| H-01-1 | 4    | 2     | 1956    | 30 °13.226' | 112 °04.471' |
| H-01-5 | 3.98 | 1.99  | 1946.22 | 30 °15.548' | 111 °33.107' |
| H-02-5 | 3.97 | 1.985 | 1941.33 | 30 °15.548' | 111 °33.107' |
| H-03-5 | 3.97 | 1.985 | 1941.33 | 30 °24.674' | 111 °25.936' |
| H-04-1 | 4    | 2     | 1956    | 30 °23.913' | 113 °01.310' |
| H-05-5 | 8.58 | 4.29  | 4195.62 | 31 °51.022' | 113 °03.640' |
| H-10-5 | 4.44 | 2.22  | 2171.16 | 31 °27.689' | 112 °28.107' |

|        |      |       |         |             |              |
|--------|------|-------|---------|-------------|--------------|
| H-11-1 | 4.44 | 2.22  | 2171.16 | 30 °57.414' | 112 °39.037' |
| H-11-5 | 4.28 | 2.14  | 2092.92 | 31 °25.850' | 112 °34.793' |
| H-14-4 | 3.7  | 1.85  | 1809.3  | 30 °41.296' | 112 °51.729' |
| H-16-5 | 4.3  | 2.15  | 2102.7  | 30 °40.772' | 112 °55.372' |
| H-05-1 | 4.31 | 2.155 | 2107.59 | 30 °23.913' | 113 °01.310' |
| I-10-1 | 3.93 | 1.965 | 1921.77 | 29 °09.283' | 112 °02.169' |
| I-11-1 | 4.25 | 2.125 | 2078.25 | 29 °06.640' | 111 °59.121' |
| I-13-1 | 4.25 | 2.12  | 2073.36 | 29 °22.919' | 111 °59.395' |
| I-14-1 | 4.25 | 2.125 | 2078.25 | 29 °32.274' | 112 °11.343' |
| I-14-5 | 4.25 | 2.125 | 2078.25 | 29 °25.496' | 112 °09.587' |
| I-15-1 | 4.21 | 2.105 | 2058.69 | 29 °33.360' | 112 °11.867' |
| I-03-1 | 4.17 | 2.085 | 2039.13 | 29 °34.991' | 113 °17.515' |
| I-04-5 | 4.1  | 2.05  | 2004.9  | 29 °27.698' | 112 °55.303' |
| I-07-1 | 4.36 | 2.18  | 2132.04 | 29 °17.930' | 112 °37.570' |
| I-09-5 | 4.12 | 2.06  | 2014.68 | 29 °08.192' | 112 °15.551' |

---

Supplementary Table S2 2C DNA content and 1C mean genome size of 7 *M. sinensis*, 8 *M. floridulus*, 6 *M. sacchariflorus*, and 4 *M. x giganteous* accessions.

| Accession name           | 2C DNA content<br>Mean $\pm$ SE | 2C/2n | Mean genome size<br>(Mbp/1C) |
|--------------------------|---------------------------------|-------|------------------------------|
| <i>M. sinensis</i>       |                                 |       |                              |
| mg108                    | 8.52                            | 4.26  | 4166.28                      |
| mg114                    | 5.39                            | 2.695 | 2635.71                      |
| mg111                    | 5.42                            | 2.71  | 2650.38                      |
| mg001                    | 5.1                             | 2.55  | 2493.9                       |
| mg040                    | 5.24                            | 2.62  | 2562.36                      |
| mg002                    | 5.14                            | 2.57  | 2513.46                      |
| mg165                    | 5.37                            | 2.685 | 2625.93                      |
| <i>M. floridulus</i>     |                                 |       |                              |
| mg113                    | 5.06                            | 2.53  | 2474.34                      |
| mg147                    | 5.38                            | 2.69  | 2630.82                      |
| mg150                    | 5.32                            | 2.66  | 2601.48                      |
| mg152                    | 4.9                             | 2.45  | 2396.1                       |
| mg156                    | 5.08                            | 2.54  | 2484.12                      |
| mg157                    | 5.06                            | 2.53  | 2474.34                      |
| mg101                    | 5.1                             | 2.55  | 2493.9                       |
| mg110                    | 5.5                             | 2.75  | 2689.5                       |
| <i>M. sacchariflorus</i> |                                 |       |                              |
| mg116                    | 3.83                            | 1.915 | 1872.87                      |
| mg129                    | 4.14                            | 2.07  | 2024.46                      |
| mg136                    | 3.76                            | 1.88  | 1838.64                      |
| mg137                    | 3.98                            | 1.99  | 1946.22                      |
| mg138                    | 4.07                            | 2.035 | 1990.23                      |
| mg063                    | 8.42                            | 4.21  | 4117.38                      |
| <i>M. x giganteous</i>   |                                 |       |                              |
| mg0244                   | 6.97                            | 3.485 | 3408.33                      |
| mgo245                   | 6.97                            | 3.485 | 3408.33                      |
| mg0249                   | 6.95                            | 3.475 | 3398.55                      |
| mg0250                   | 6.84                            | 3.42  | 3344.76                      |
